1 **HERV-K and HERV-W transcriptional activity in Myalgic**  
2 **Encephalomyelitis/ Chronic Fatigue Syndrome**

3

4 **Short title: Endogenous retroviruses in ME/CFS**

5

6 Lucas S Rodrigues <sup>1#</sup>, Luiz H da Silva Nali <sup>1,2#</sup>, Cibele O D Leal <sup>1</sup>, Ester C Sabino <sup>1,3</sup>,  
7 Eliana M Lacerda<sup>4</sup>, Caroline C Kingdon<sup>4</sup>, Luis Nacul<sup>4</sup>, Camila M Romano<sup>1,5\*</sup>

8

- 9 1. Instituto de Medicina Tropical de São Paulo, Universidade de São Paulo, São  
10 Paulo, Brazil  
11 2. Universidade Santo Amaro, Pós-Graduação em Ciências da Saúde  
12 3. Departamento de Moléstias Infecciosas e Parasitárias, Faculdade de Medicina da  
13 Universidade de São Paulo, São Paulo, Brazil  
14 4. Department of Clinical Research, Faculty of Infectious and Tropical Diseases,  
15 London School of Hygiene and Tropical Medicine, London, United Kingdom  
16 5. Hospital das Clinicas HCFMUSP (LIM52), Faculdade de Medicina,  
17 Universidade de São Paulo, São Paulo, Brazil

18

19 # These authors contributed equally to this manuscript

20 \* Correspondence to: CMR, Laboratório de Virologia, Instituto de Medicina Tropical de  
21 São Paulo, Universidade de São Paulo, Rua Dr. Enéas de Carvalho Aguiar, 470, ZIP.  
22 05403-000 São Paulo, SP, Brazil. phone: +55 11 3061-8668; cmromano@usp.br

23

24

25 **Keywords:** Endogenous retroviruses; HERV-W; HERV-K; myalgic encephalomyelitis;  
26 chronic fatigue

27

28

29 **Abstract**

30 Chronic Fatigue Syndrome / Myalgic Encephalomyelitis (CFS / MS) is an  
31 incapacitating chronic disease that dramatically compromise the life quality. The  
32 CFS/ME pathogenesis is multifactorial, and it is believed that immunological, metabolic  
33 and environmental factors play a role. It is well documented an increased activity of  
34 Human endogenous retroviruses (HERVs) from different families in autoimmune and  
35 neurological diseases, making these elements good candidates for biomarkers or even  
36 triggers for such diseases. Here the expression of Endogenous retroviruses K and W  
37 (HERV-K and HERV-W) was determined in blood from moderately and severely  
38 affected ME/CFS patients. HERV-K was overexpressed only in moderately affected  
39 individuals and HERV-W showed no difference. This is the first report about HERV-K  
40 differential expression in moderate ME/CFS.

41

42

43

44

45

46

47

48

49

50

## 51 **Introduction**

52 Myalgic Encephalomyelitis/ Chronic Fatigue Syndrome (ME/CFS) is a chronic and  
53 debilitating disease with unknown etiology [1]. Affected individuals have compromised  
54 motor and cognitive capacities. There is a wide variation in the symptoms of this  
55 disease, which include joint pains, mood disturbance, and malaise and worsening of  
56 symptoms following minimal physical or mental exertion. More severe symptoms can  
57 be also present including extreme exhaustion, severe joint pains with no apparent cause,  
58 non-restorative sleep and a range of immune and neurological symptoms. These  
59 symptoms may lead to depression and social isolation in the person with ME/CFS [1].  
60 The pathophysiology of the ME/CFS is not understood and there is no diagnostic  
61 biomarker available. There is still controversy over the etiology of the disease; however,  
62 it is widely accepted that several immunological alterations are present in ME/CFS  
63 patients [2]. In addition, accumulated evidence for an association of ME/CFS with viral  
64 infections also exists and many patients report the onset of their symptoms during or  
65 right after a flu-like illness [3]. Thereafter, an unusual autoimmune response against the  
66 infection would be responsible for the perpetuation of the ME/CFS symptoms. Viral  
67 participation is finally supported by the evidences of clinical benefit of patients treated  
68 with valganciclovir [4]. Unfortunately, the absence of large cohort studies that  
69 investigate at the molecular level the participation of infectious agents on the ME/CFS  
70 pathogenesis impairs our understanding of this disease.

71 Human Endogenous Retroviruses (HERVs) are derived from exogenous retroviral  
72 infections, which occurred early in the evolution of vertebrates. Due to active  
73 replication and transposition events, HERVs are extensively distributed through the host

74 genome and constitute about 8% of the human genome [5]. Due to accumulated  
75 mutations over the primate and human evolution, most HERVs are non-functional, but  
76 intact open reading frames of some HERVs persist and can be reactivated in response to  
77 systemic and environmental factors such as hormones, stress, and infection by  
78 exogenous viruses including almost all human herpesviruses, HIV and others [6,7].  
79 Given their potential pathogenic effects, which include molecular mimicry and immune  
80 deregulation, HERVs are often postulated as possible causes of autoimmune diseases.  
81 Among the more than 30 families, the K and W families are the most recently  
82 integrated, the most active, and have been frequently associated with neurological and  
83 autoimmune diseases such as multiple sclerosis, diabetes mellitus SLE, ALS and  
84 rheumatoid arthritis [8].

85 To our knowledge, only two studies have investigated the participation of endogenous  
86 retroviruses in ME/CFS with contrasting results [9,10].

87 Given the extensively described altered patterns of HERVs in several diseases and the  
88 gap in knowledge of its expression in ME/CFS, we investigated the expression of the  
89 HERVs K and W in patients diagnosed with ME/CFS.

90

## 91 **Methods**

92

## 93 **Participants**

94

95 We used PBMC samples from a hundred patients diagnosed with ME/CFS and stored  
96 in the UK ME/CFS Biobank (UKMEB) at the London School of Hygiene and Tropical  
97 Medicine in this study. The UKMEB is among the few biorepositories worldwide with

98 advanced storage and linked research infrastructure dedicated to research into ME/CFS  
99 [11]. Seventy five samples were requested from participants diagnosed with moderate  
100 fatigue (ME/CFSm), and 25 from participants with severe fatigue (ME/CFSs). Samples  
101 from 70 healthy controls (also provided by the UKMEB) were included. This study was  
102 approved by LSHTM and University of São Paulo ethical committees [#EC.2017.02  
103 and #2728254 respectively].

104

### 105 **RNA extraction and Real Time PCR**

106

107 RNA extraction from the PBMC samples was performed by the Trizol-chloroform  
108 method, with 1ml Trizol and subsequent addition of chloroform to solubilize lipids  
109 allowing its removal. The samples were centrifuged at 15,000 rpm for 15 minutes and  
110 the upper phase containing the RNA was further used. The material was precipitated  
111 with Isopropanol 100% and washed with 75% Ethanol. In both steps the material was  
112 centrifuged at 15,000 RPM for 10 minutes at 4 °C. After this process, the pellets were  
113 dried at room temperature for 10 minutes, and the RNA was eluted in 45µl of Nuclease-  
114 Free H<sub>2</sub>O. The decontamination of remnant DNA was performed using two rounds  
115 DNase treatment (Turbo DNA-Free (Ambion) following the manufacturer's  
116 instruction. The absence of DNA was confirmed by real time PCR without reverse  
117 transcriptase using primers for HERV-K or HERV-W (see primers description bellow).  
118 After this procedure, cDNA was synthesized using the High capacity cDNA Reverse  
119 Transcription kit (Ambion, USA) according the manufacturer's instructions. Real-time  
120 PCRs were performed for the HERV-W, - K and the endogenous gene using the primers  
121 and conditions used previously by Nali et al [12] using the Sybr Green method. The  
122 primers used are described in Table 1.

123

124

125

126 Table 1. Primers used in real-time PCR assays

| Oligo  | Sense                   | Antisense                   |
|--------|-------------------------|-----------------------------|
| HERV-W | CCAATGCATCAGGTGGGTAAC   | GAGGTACCACAGACAAAAAATATTCCT |
| HERV-K | TCCCCTTGGAATACTCCTGTTTT | CATTCCTGTGGTAAACTTTCCA      |
| GAPDH  | ACCCACTCCTCCACCTTTGAC   | TGTTGCTGTAGCCAAATTCGTT      |

127

128

129 The cycling conditions for both HERVs detection were: 50 °C for 2 minutes, 95 °C for  
130 10 minutes, followed by 40 cycles of 95 °C for 15 seconds, 50 °C for 1 minute, 60 °C  
131 for 1 minute. HERV activity was qualitatively (referred as presence/absence) and  
132 quantitatively (level of expression) evaluated. As positive controls we used a plasmid  
133 containing both HERV-W envelope and HERV-K polymerase fragments correspondent  
134 to the region covered by the primers used. The level of expression was determined by  
135 calculation of  $2^{-\Delta\Delta C_t}$ , and the results were represented as fold changes. Statistical analysis  
136 was performed using the Wilcox test in the GraphPad Prism program v.6.04.  
137 Samples were only considered positive for HERVs and included in the analyses if  
138 expression of the endogenous control was also detected.

139

140

## 141 **Results**

142 General description of individuals included in the study is described in Table 2. As  
143 expected, women were 4 times more prevalent than men. Therefore, we adjusted the  
144 control group to the same gender prevalence. HERV-K and W expression were  
145 evaluated in ME/CFS patients and healthy controls; and some level of expression of

146 HERV-W was detected in all patients with severe fatigue and in 72/75 ME/CFSm  
 147 (96%). HERV-K was also detected in all severe cases but in 65/75 of moderate cases  
 148 (86.6%). The healthy control group was very similar to the moderate group, with 68/70  
 149 (97%) and 60/70 (85.7%) presenting expression of HERV-W and HERV-K respectively  
 150 (Table 2). Only one patient with moderate fatigue and one control individual had no  
 151 HERV activity at all. No relation was observed regarding HERV detection and duration  
 152 of disease.

153 Table 2. Main characteristics of individuals included in the study.

154

| Participants (#) | Age<br><i>median (max, min)</i> | Gender (%) |       | Time of disease<br><i>median (max, min)</i> | Detection of HERV<br>activity* |      |
|------------------|---------------------------------|------------|-------|---------------------------------------------|--------------------------------|------|
|                  |                                 | M          | F     |                                             | HK                             | HW   |
| ME/CFSs (25)     | 43.3 (25-62)                    | 24%        | 76%   | 16.8 (2.8-40)                               | 100%                           | 100% |
| ME/CFSm (75)     | 22.9 (18-64)                    | 25,4%      | 74,6% | 11.2 (0.2 – 33.7)                           | 86.6%                          | 96%  |
| Controls (70)    | 42.8 (19-63)                    | 25.7%      | 74.3% | -                                           | 85.7%                          | 97%  |

155 \* Qualitatively

156

157 Regarding to the level of expression (quantitative analysis), real time results revealed  
 158 that HERV-W did not present significant differences when the healthy controls (HCs)  
 159 or the two ME/CFS groups were compared between each other (Figure 1 A), i.e.  
 160 ME/CFSs vs HCs ( $p = 0.89$ ), ME/CFSm vs HCs ( $p = 0.77$ ), ME/CFSs vs ME/CFSm ( $p$   
 161  $= 0.95$ ), all patients ME/CFS vs HCs ( $p = 0.78$ ).

162 On the other hand, the HERV-K expression differed significantly between ME/CFSm  
163 group and the HCs ( $p = 0.050$ ). HERV-K activity was not distinct between the ME/CFS  
164 groups: ME/CFSs vs ME/CFSm ( $p = 0.12$ ), ME/CFS vs HCs ( $p = 0.17$ ). ME/CFSs vs  
165 HCs ( $p = 0.97$ ) (Figure 1 B).

166 [FIGURE 1]

167

## 168 **Discussion**

169 The most recognized and widely-used case definitions (Fukuda [13] and Canadian  
170 Consensus criteria [1]) are based on self-reported symptoms. Studies of energy  
171 metabolism, oxidative stress and immunological alterations in ME/CFS have  
172 demonstrated imbalance in all these pathways, but the use of such information for  
173 diagnostic purposes is still far from reality.

174 Here, HERV-K and W transcripts were detected in all groups investigated, and we  
175 found that HERV-K was overexpressed in moderate ME/CFS. It is possible that the  
176 immunological, genic expression and metabolic alterations are different according to  
177 disease severity.

178 The interplay between endogenous retroviruses and the immune system is complex.  
179 ERVs are part of the host genome and in theory, they are supposed to be recognized as  
180 self-antigens and an immune tolerance should be established during the early stages of  
181 the organism development [14]. However, HERV products can interact with  
182 components of the innate immune system leading to the activation of pro-inflammatory  
183 pathways or, in some particular cases, their suppression [15]. The syncytin -2 protein  
184 for example, is a product of the ERV-FRD Env gene that has an immunosuppressive  
185 role by preventing maternal immune response against the fetus [16]. In a distinct



186 scenario, it was demonstrated using psoriasis model that a pro-inflammatory  
187 environment could be able to suppress the expression of repetitive elements, including  
188 HERVs [17]. It would be reasonable to suggest that the immunological enhancement  
189 seen in more severe ME/CFS works by silencing the HERV transactivation that occurs  
190 in moderate cases. Such transactivation could be caused by exogenous viral replication  
191 or another as yet unknown factor. In line with this, Montoya and colleagues (2017)  
192 found a cytokine signature of severity in people with ME/CFS [18]. They demonstrated  
193 that from the 17 cytokines related to severity, 13 are pro-inflammatory, and (in addition  
194 to the worsening of the symptoms) may cause the reversion of the HERV-K activity to  
195 levels similar to those seen in healthy individuals. It may similarly occur with HERV-  
196 W, which, despite not being at significant levels, there was a slight decrease in people  
197 severely affected by ME/CFS when compared to those who are moderately affected.

198

199 Infection has often been considered as a trigger to ME/CFS. Many patients report that  
200 the fatigue began during or short after an episode of infectious disease. A number of  
201 pathogens including viruses have been associated with this disease [3]. And, due to its  
202 life long persistence and broad cell tropism, the herpesviridae family, particularly HHV-  
203 6 has been considered to be a possible trigger for ME/CFS for many, even though such  
204 relationship has not been consistent [3,9]. Interestingly, HHV-6 as some other  
205 herpesviruses, is also capable of transactivating HERVs, particularly, HERV-K [6].  
206 Such transactivation may be either direct (through LTR activation by viral products) or  
207 indirect (via transcriptional binding factors and cytokines produced by viral replication)  
208 [3,6]. It is possible that as the disease progresses, whatever the exogenous infection that  
209 would have act as the trigger factor is controlled, and consequently, the HERVs

210 transactivation decrease. Unfortunately, we did not perform serological or molecular  
211 tests for exogenous viruses.

212 Two reports of HERV activity in ME/CFS were published some years ago but the  
213 results were conflicting. In 2013 Oakes and his team found no difference on the  
214 expression of HERV-K18 envelope in people with ME/CFS when compared with HCs  
215 [9]. In the same year De Meirleir and colleagues, using immunohistochemical methods,  
216 found immunoreactivity to HERV proteins (HERV-K, HERV-18, HERV-R and HERV-  
217 FRD) in dendritic cells of the duodenum of individuals diagnosed with the syndrome  
218 [10], suggesting that alterations in endogenous retroviruses expression pattern may  
219 occur in ME/CFS. The differences between the results of Oakes and colleagues and ours  
220 may be due to the methods used to detect HERV-K. While the present work used  
221 generic primers for HERV-K that allow the detection of hundreds of elements from  
222 most HML subfamilies the Oakes team searched for the HERV-K 18 envelope  
223 transcripts only, using a method specific to this particular element, while neglecting all  
224 the remaining proviruses from the K family. On the other hand, we are unable to  
225 determine which K family proviruses are involved in the differential expression  
226 observed.

227 The molecular method used here to detect HERV-W was also generic and was widely  
228 used in several studies that found differential expression of this element in pathological  
229 conditions, including in the blood, brain and CSF of multiple sclerosis (MS) patients  
230 [19]. Therefore, despite the similarity of a number of symptoms and the strong  
231 immunological component of ME/CFS and MS, the mechanisms responsible for HERV  
232 reactivation in such diseases are likely distinct.

233 In conclusion, this is the first report that demonstrates increased expression of an  
234 endogenous retrovirus in the blood of individuals with moderate ME/CFS. While the  
235 increased expression of these retroelements can't be directly associated to the ME/CFS  
236 pathogeny, the observation of this phenomenon cannot be ignored.

237

238 **Funding:** This work was supported by Fundação de Amparo à Pesquisa do Estado de  
239 São Paulo (FAPESP) [grant number 15/05958-3]. LN, EL and CK have been funded by  
240 the National Institutes of Health (NIH USA) under award number [2R01AI103629],  
241 however the content is solely the responsibility of the authors and does not necessarily  
242 represent the official views of the NIH.

243

244

245

246

247

248

249

250

251

252

253

254

255

256

257

258

259

260

261 **References**

262 1. Carruthers BM, Jain AK, De Meirleir KL, Peterson DL, Klimas NG, Lerner AM,  
263 et al. Myalgic Encephalomyelitis/Chronic Fatigue Syndrome. *J Chronic Fatigue*  
264 *Syndr.* 2003;11(1):7–115.

265 2. Lorusso L, Mikhaylova S V., Capelli E, Ferrari D, Ngonga GK, Ricevuti G.  
266 Immunological aspects of chronic fatigue syndrome. *Autoimmun Rev.*  
267 2009;8(4):287–291.

268 3. Rasa S, Nora-Krukle Z, Henning N, Eliassen E, Shikova E, Harrer T, et al.  
269 Chronic viral infections in myalgic encephalomyelitis/chronic fatigue syndrome  
270 (ME/CFS). *J Transl Med.* 2018;16(1):268.

271 4. Watt T, Oberfoell S, Balise R, Lunn MR, Kar AK, Merrihew L, et al. Response  
272 to valganciclovir in chronic fatigue syndrome patients with human herpesvirus 6  
273 and Epstein-Barr virus IgG antibody titers. *J Med Virol.* 2012;84(12):1967–1974.

274 5. Weiss RA. The discovery of endogenous retroviruses. *Retrovirology.*  
275 2006;3(1):67.

276 6. Chen J, Foroozesh M, Qin Z. Transactivation of human endogenous retroviruses  
277 by tumor viruses and their functions in virus-associated malignancies.  
278 *Oncogenesis.* 2019;8(1):6.

279 7. Nellåker C, Yao Y, Jones-Brando L, Mallet F, Yolken RH, Karlsson H.  
280 Transactivation of elements in the human endogenous retrovirus W family by  
281 viral infection. *Retrovirology.* 2006;3(1):44.

282 8. Gröger V, Cynis H. Human Endogenous Retroviruses and Their Putative Role in  
283 the Development of Autoimmune Disorders Such as Multiple Sclerosis. *Front*  
284 *Microbiol.* 2018 ;9:265.

285 9. Oakes B, Hoagland-Henefield M, Komaroff AL, Erickson JL, Huber BT. Human  
286 Endogenous Retrovirus-K18 Superantigen Expression and Human Herpesvirus-6  
287 and Human Herpesvirus-7 Viral Loads in Chronic Fatigue Patients. *Clin Infect*  
288 *Dis.* 2013;56(10):1394–1400.

289 10. De Meirleir KL, Khaiboullina SF, Frémont M, Hulstaert J, Rizvanov AA, Palotás  
290 A, et al. Plasmacytoid dendritic cells in the duodenum of individuals diagnosed  
291 with myalgic encephalomyelitis are uniquely immunoreactive to antibodies to

- 292 human endogenous retroviral proteins. *In Vivo*. 2013;27(2):177–187.
- 293 11. Lacerda EM, Mudie K, Kingdon CC, Butterworth JD, O’Boyle S, Nacul L. The  
294 UK ME/CFS Biobank: A Disease-Specific Biobank for Advancing Clinical  
295 Research Into Myalgic Encephalomyelitis/Chronic Fatigue Syndrome. *Front*  
296 *Neurol*. 2018 Dec;9:1026.
- 297 12. Nali LHS, Oliveira ACS, Alves DO, Caleiro GS, Nunes CF, Gerhardt D, et al.  
298 Expression of human endogenous retrovirus K and W in babies. *Arch Virol*.  
299 2017;162(3):857–861.
- 300 13. Fukuda K, Straus SE, Hickie I, Sharpe MC, Dobbins JG, Komaroff A. The  
301 chronic fatigue syndrome: a comprehensive approach to its definition and study.  
302 International Chronic Fatigue Syndrome Study Group. *Ann Intern Med*.  
303 1994;121(12):953–959.
- 304 14. Tugnet N, Rylance P, Roden D, Trela M, Nelson P. Human Endogenous  
305 Retroviruses (HERVs) and Autoimmune Rheumatic Disease: Is There a Link?  
306 *Open Rheumatol J*. 2013;7:13–21.
- 307 15. Magiorkinis G, Hurst TP. Activation of the innate immune response by  
308 endogenous retroviruses. *J Gen Virol*. 2015;96(6):1207–1218.
- 309 16. Mangeney M, Renard M, Schlecht-Louf G, Bouallaga I, Heidmann O, Letzelter  
310 C, et al. Placental syncytins: Genetic disjunction between the fusogenic and  
311 immunosuppressive activity of retroviral envelope proteins. *Proc Natl Acad Sci*.  
312 2007;104(51):20534–20539.
- 313 17. Lättekivi F, Kõks S, Keermann M, Reimann E, Prans E, Abram K, et al.  
314 Transcriptional landscape of human endogenous retroviruses (HERVs) and other  
315 repetitive elements in psoriatic skin. *Sci Rep*. 2018;8(1):4358.
- 316 18. Montoya JG, Holmes TH, Anderson JN, Maecker HT, Rosenberg-Hasson Y,  
317 Valencia IJ, et al. Cytokine signature associated with disease severity in chronic  
318 fatigue syndrome patients. *Proc Natl Acad Sci*. 2017;114(34):E7150–8.
- 319 19. Morandi E, Tanasescu R, Tarlinton RE, Constantinescu CS, Zhang W, Tench C,  
320 et al. The association between human endogenous retroviruses and multiple  
321 sclerosis: A systematic review and meta-analysis. *PLoS One*.  
322 2017;12(2):e0172415.

323

324

325

326

327 Figure 1. Boxplot of expression levels (in fold change) of HERVs among the groups. A)

328 HERV-K and B) HERV-W. Significance between the groups (obtained by Wilcox test)

329 is evidenced by an asterisk.

330

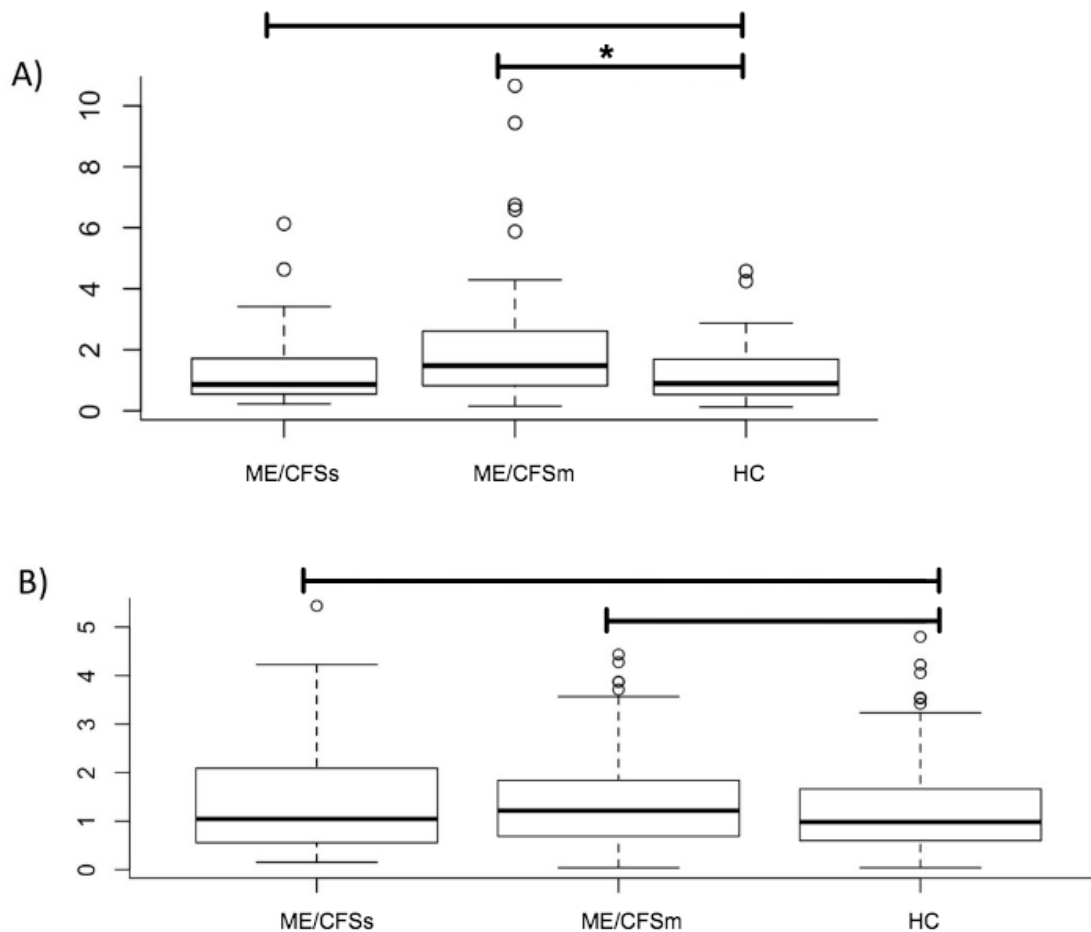

331

332
